# Supplementary material for: Structure of SRSF1 RRM1 bound to RNA reveals an unexpected bimodal mode of interaction and explains its involvement in SMN1 exon7 splicing
Source: PubMed Central journal article supplement (PMC7813835; doi:10.1038/s41467-020-20481-w), 2021-01-18
Supplement: 41467_2020_20481_MOESM1_ESM.pdf [file 41467_2020_20481_MOESM1_ESM.pdf]

A

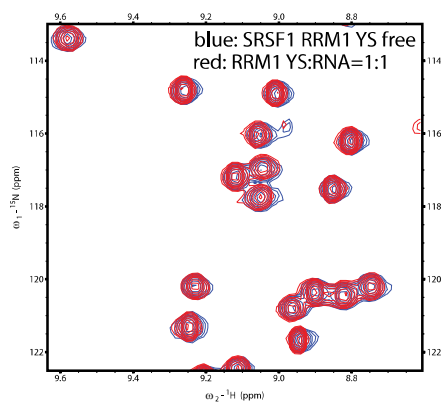

RRM1 +AAAAAA

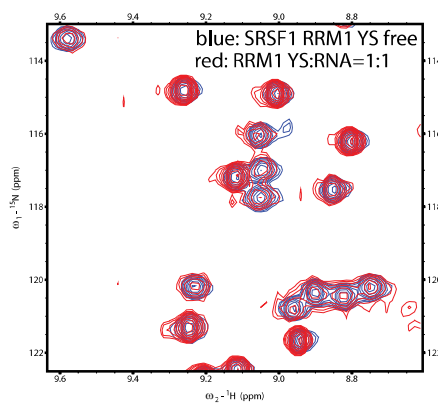

RRM1 +GGGGGG

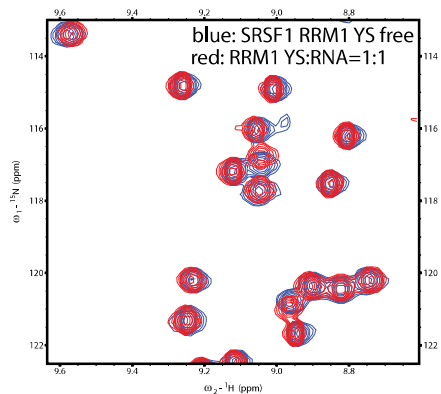

RRM1 +UUUUUU

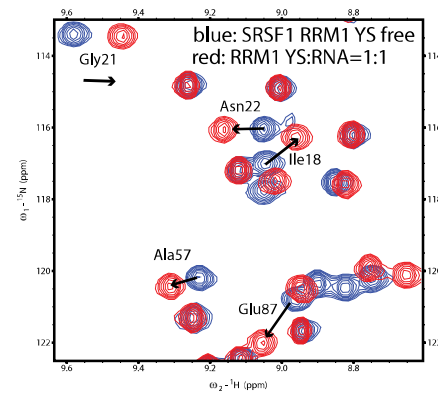

RRM1 +CCCCCC

B

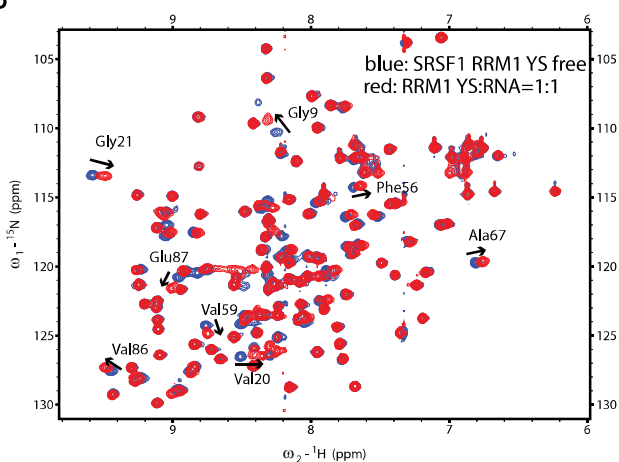

SRSF1 RRM1 + UUCAGA

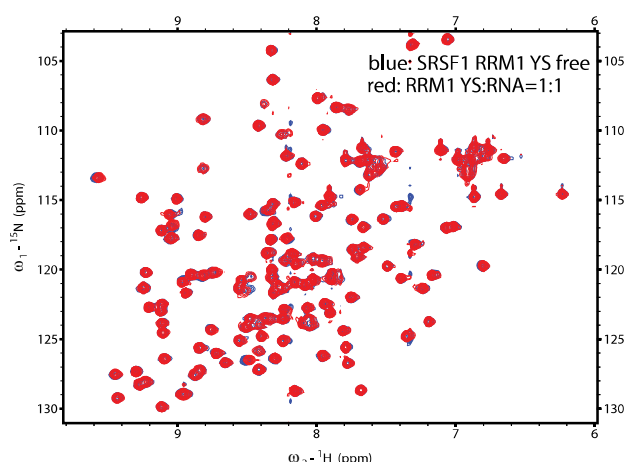

SRSF1 RRM1 + UUUAGA

C

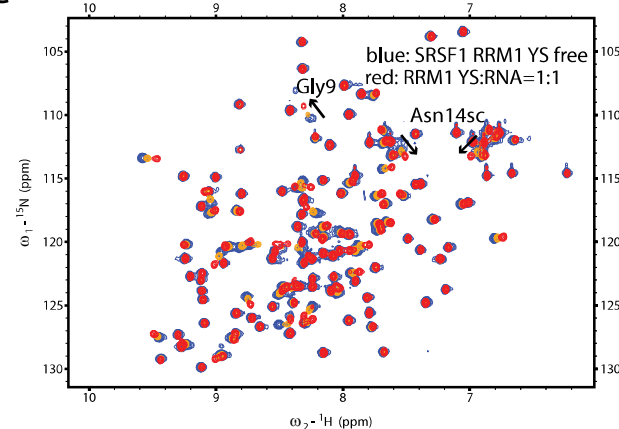

SRSF1 RRM1 + AACAAA

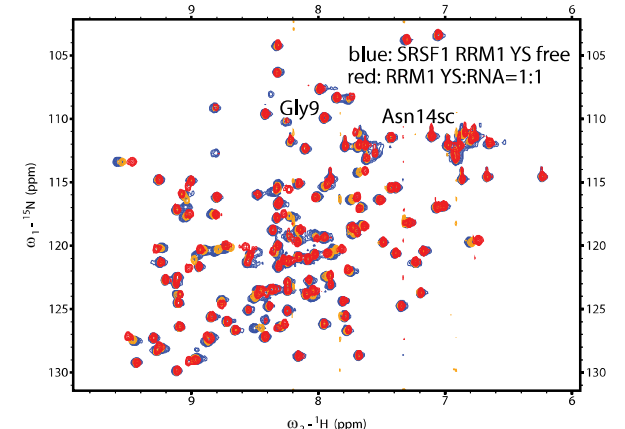

SRSF1 RRM1 + AACGAA

### Figure S1: SRSF1 RRM1 binds preferentially to cytosines

(A) Overlay of  $^1\text{H}$ - $^{15}\text{N}$  HSQC spectra measured with SRSF1 RRM1 free form (in blue) and in the presence of polyA, polyG, polyC or polyU molecules (in red). (B) Overlay of  $^1\text{H}$ - $^{15}\text{N}$  HSQC spectra measured with SRSF1 RRM1 free form (in blue) and in the presence of SMN1 ESE1 (UUCAGA) or SMN2 ESE1 (UUUAGA) (in red). (C) Overlay of  $^1\text{H}$ - $^{15}\text{N}$  HSQC spectra measured with SRSF1 RRM1 free form (in blue) and in the presence of AACAAA or AACGAA RNA (in red).

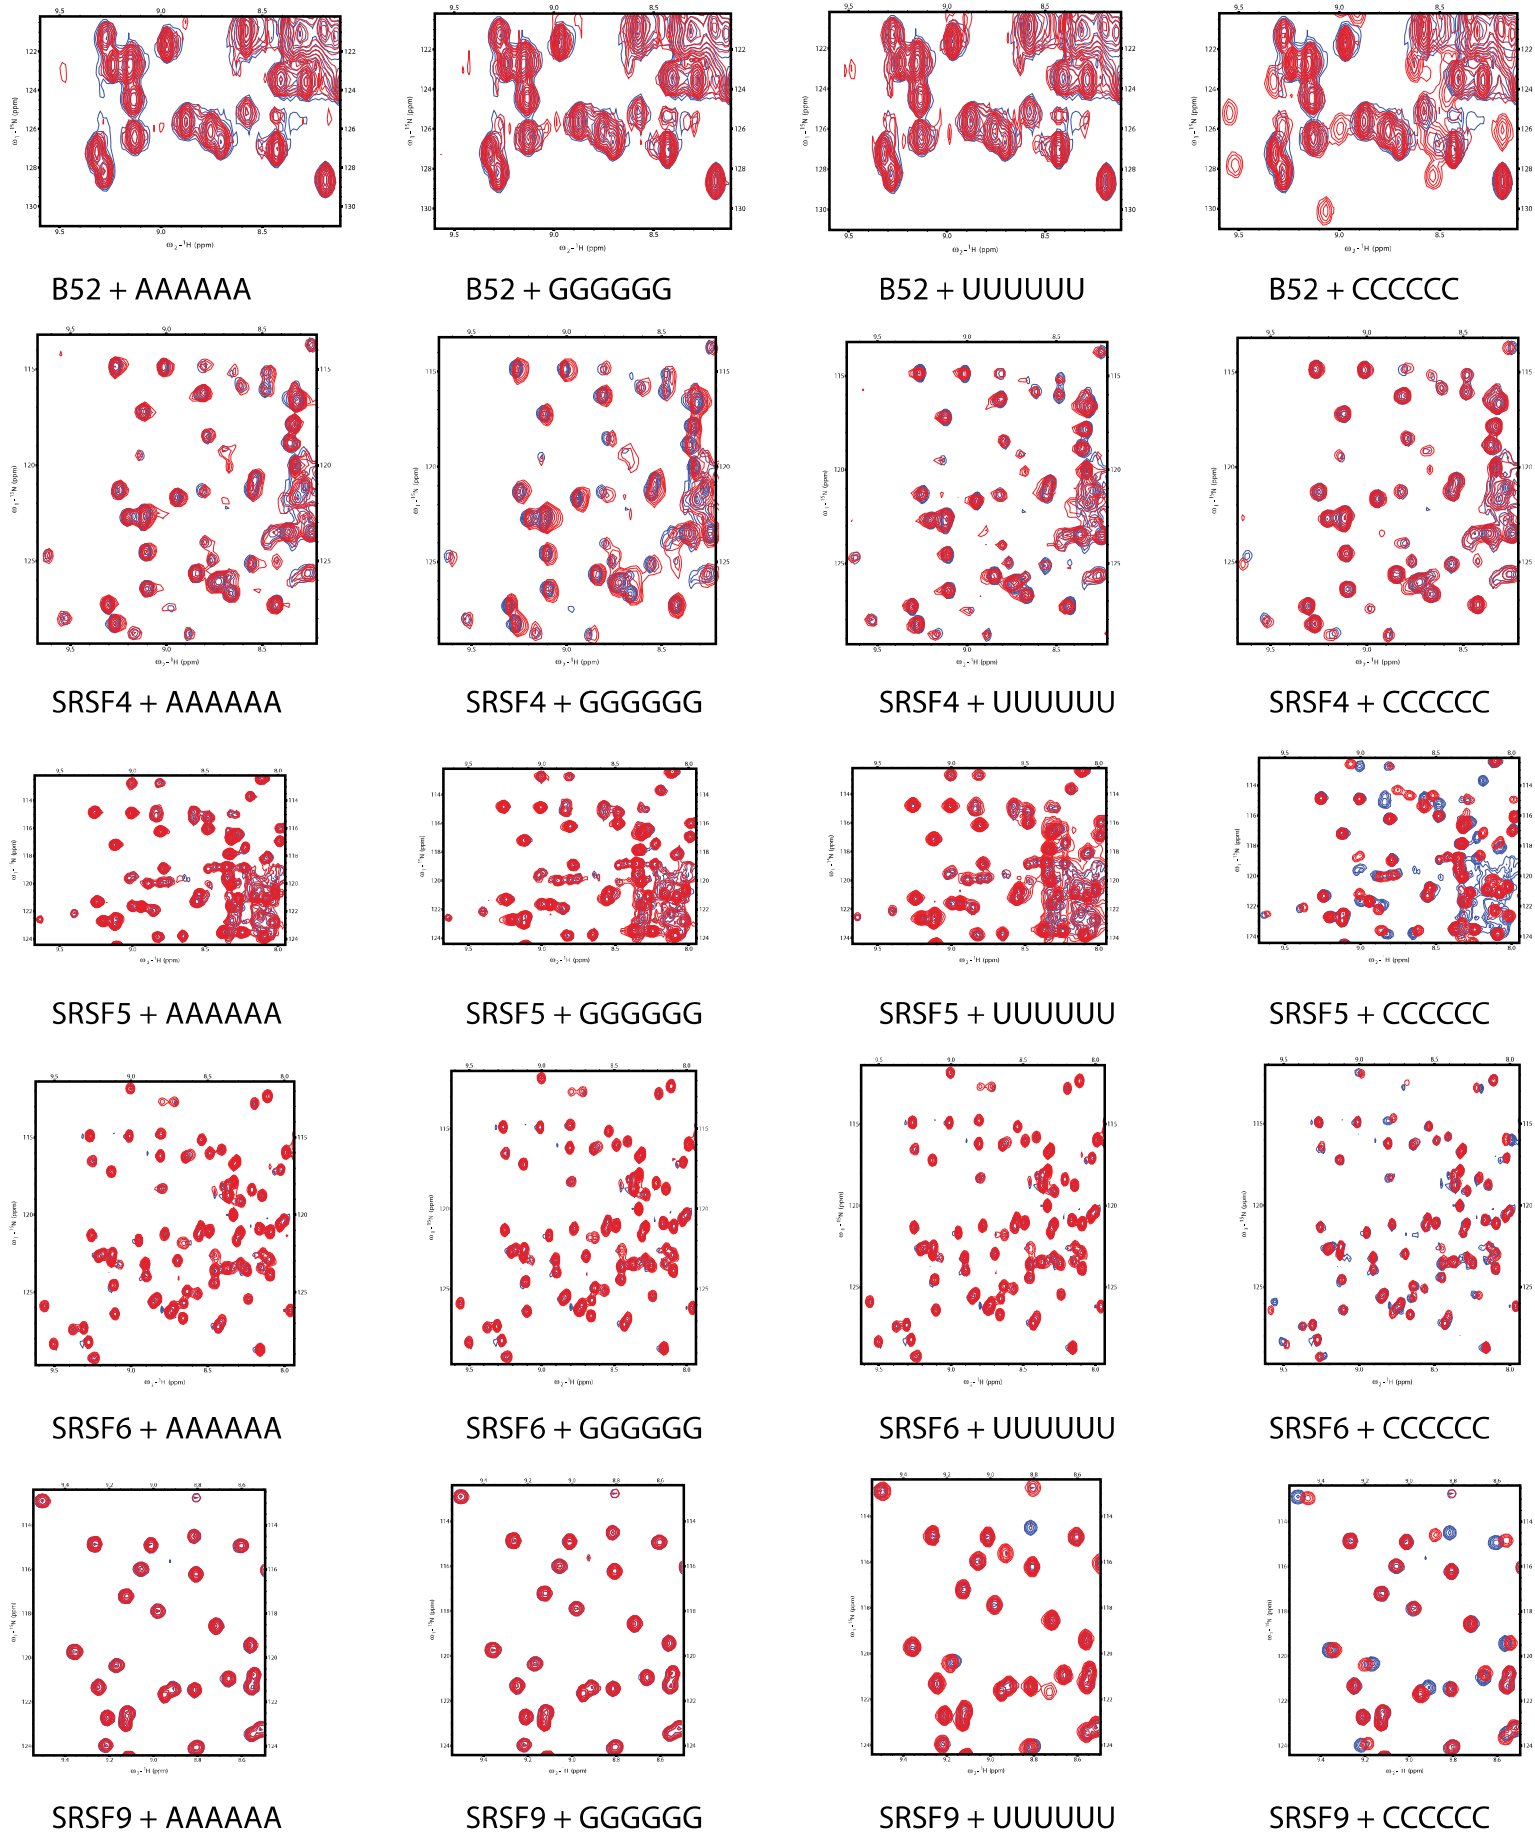

for all spectra: blue: protein free  
red: protein:RNA=1:1

**Figure S2: RRM1 domains of pseudo-RRM containing SR proteins bind preferentially to cytosines**  
 Overlay of  $^1\text{H}$ - $^{15}\text{N}$  HSQC spectra obtained with *Drosophila* B52 RRM1 and human SRSF4, SRSF5, SRSF6, SRSF9 RRM1 in their free form (in blue) and in the presence of polyA, polyG, polyC or polyU molecules (in red).

A

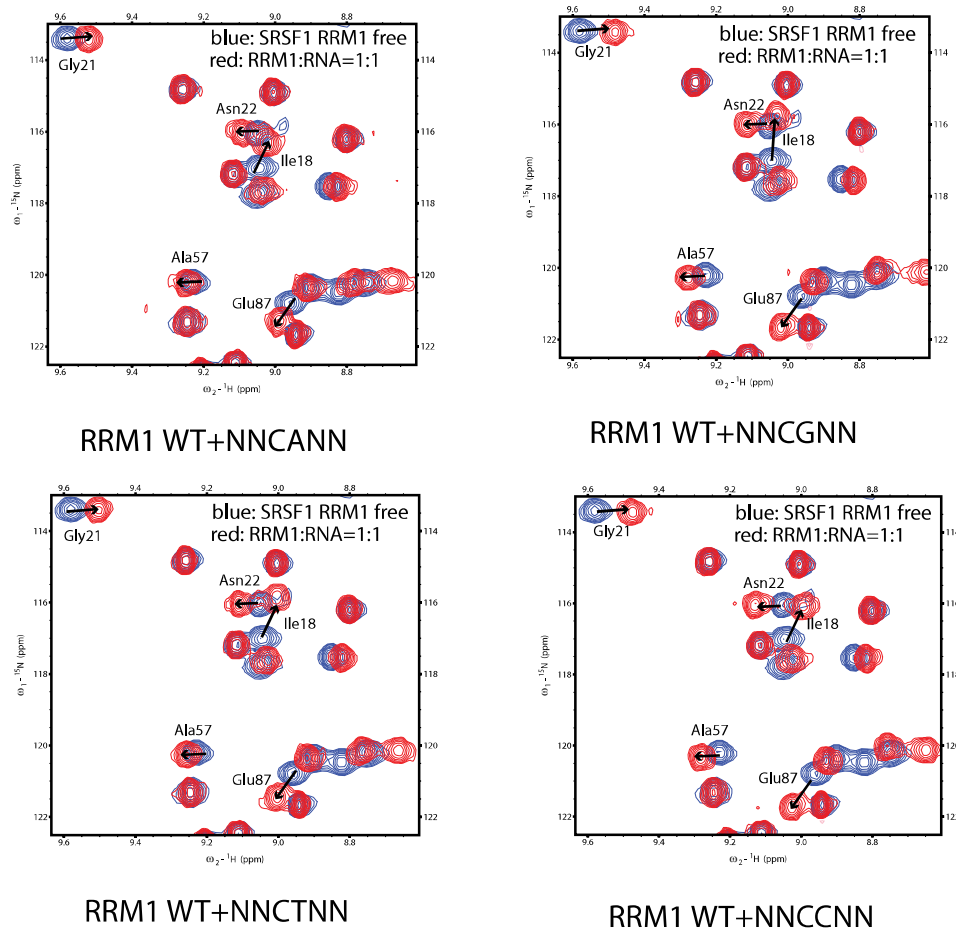

B

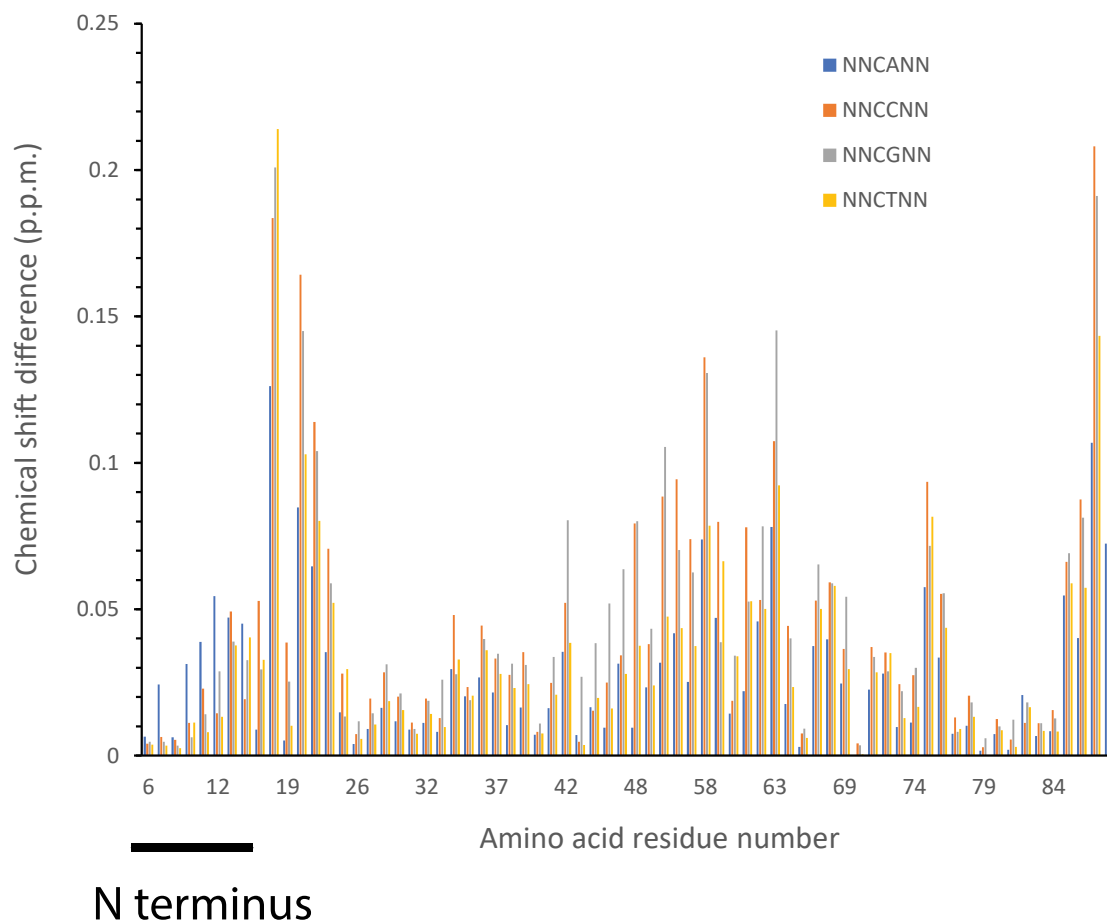

**Figure S3: SRSF1 RRM1 binds to a CN motif (N is for A, C, G or U)**

**(A)** Overlay of  $^1\text{H}$ - $^{15}\text{N}$  HSQC spectra measured with SRSF1 RRM1 free form (in blue) and in the presence of NNCANN, NNCGNN, NNCTNN and NNCCNN ssDNA (in red). **(B)** Mapping of the chemical shift perturbations observed upon interaction of SRSF1 RRM1 with these ssDNAs.

A

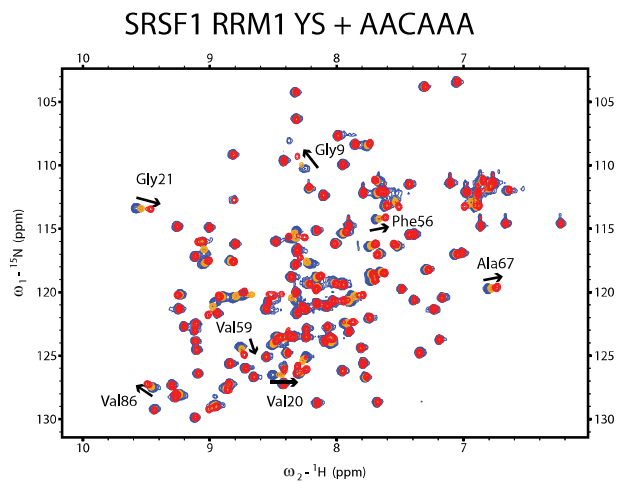

blue = free RRM1 YS  
 orange = RRM1 YS:AACAAA=0.3:1  
 red = RRM1 YS:AACAAA=1:1

B

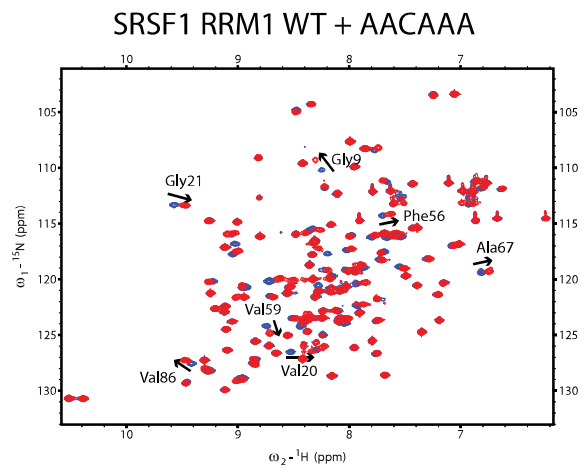

blue = free RRM1 WT  
 red = RRM1 WT:AACAAA=1:1

C

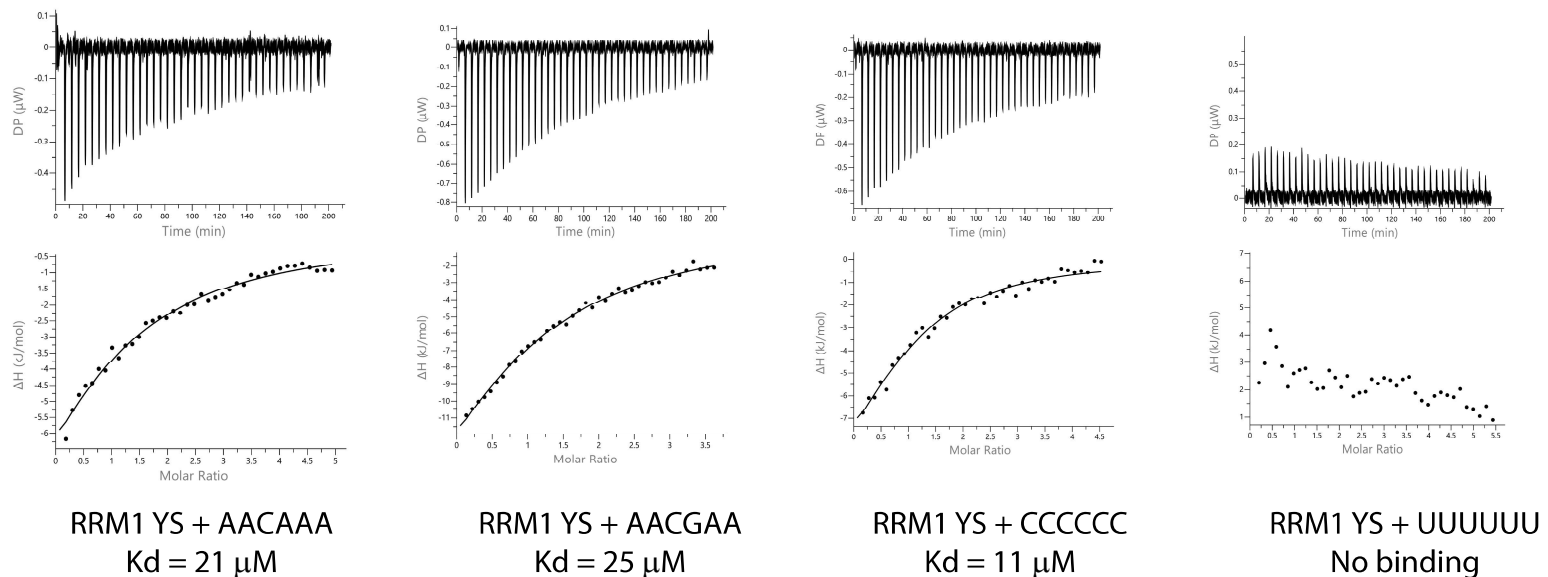

### Figure S4: Investigation of SRSF1 RRM1 Y37S+Y72S and WT binding to RNA

(A) Overlay of  $^1\text{H}$ - $^{15}\text{N}$  HSQC spectra measured with SRSF1 RRM1 Y37S+Y72S (YS) free form (in blue) and bound to AACAAA RNA at a 0.3:1 and 1:1 RNA:protein ratio (in orange and red, respectively). (B) Overlay of  $^1\text{H}$ - $^{15}\text{N}$  HSQC spectra measured with SRSF1 RRM1 WT free form (in blue) and bound to AACAAA RNA at a 1:1 RNA:protein ratio (in red). Similar chemical shift perturbations are observed at saturation (at a RNA:protein ratio of 1:1) showing that the mode of interaction with RNA and the affinity is similar for the WT and Y37S+Y72S versions of SRSF1 RRM1. (C) ITC titrations performed at 40°C with SRSF1 RRM1 YS and AACAAA, AACGAA, CCCCCC and UUUUUU RNAs.



A4H2 with I7QD1

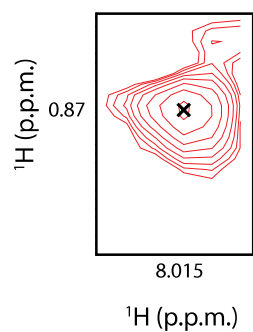

A4H2 with R8QG

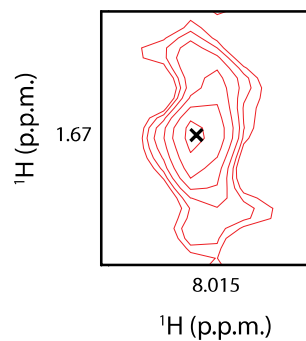

A4H2 with F58QD

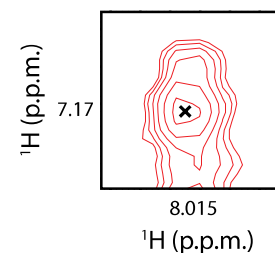

C3H5/H6 with Y19QD/QE

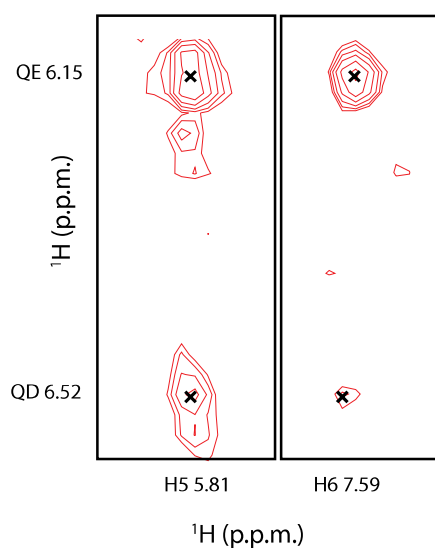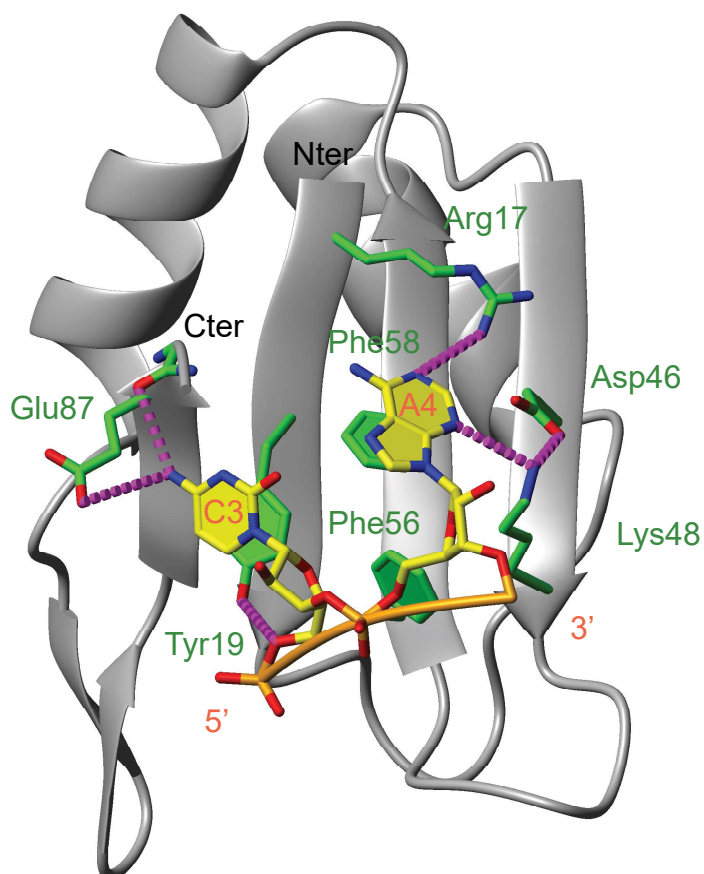

A4H8 with F56QE

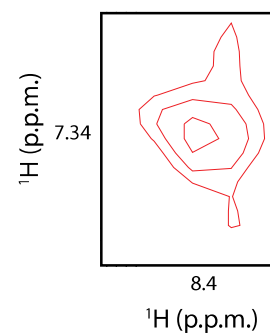

A4H1' with K48HE2/3

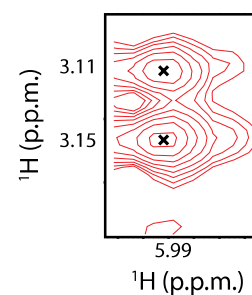

**Figure S5: Presentation of most characteristic intermolecular NOEs observed between SRSF1 RRM1 and the 5'-AACAAA-3' RNA.**

Representative intermolecular NOEs observed in 2D 1F-edited 2F-filtered NOESY experiments are shown.

**A**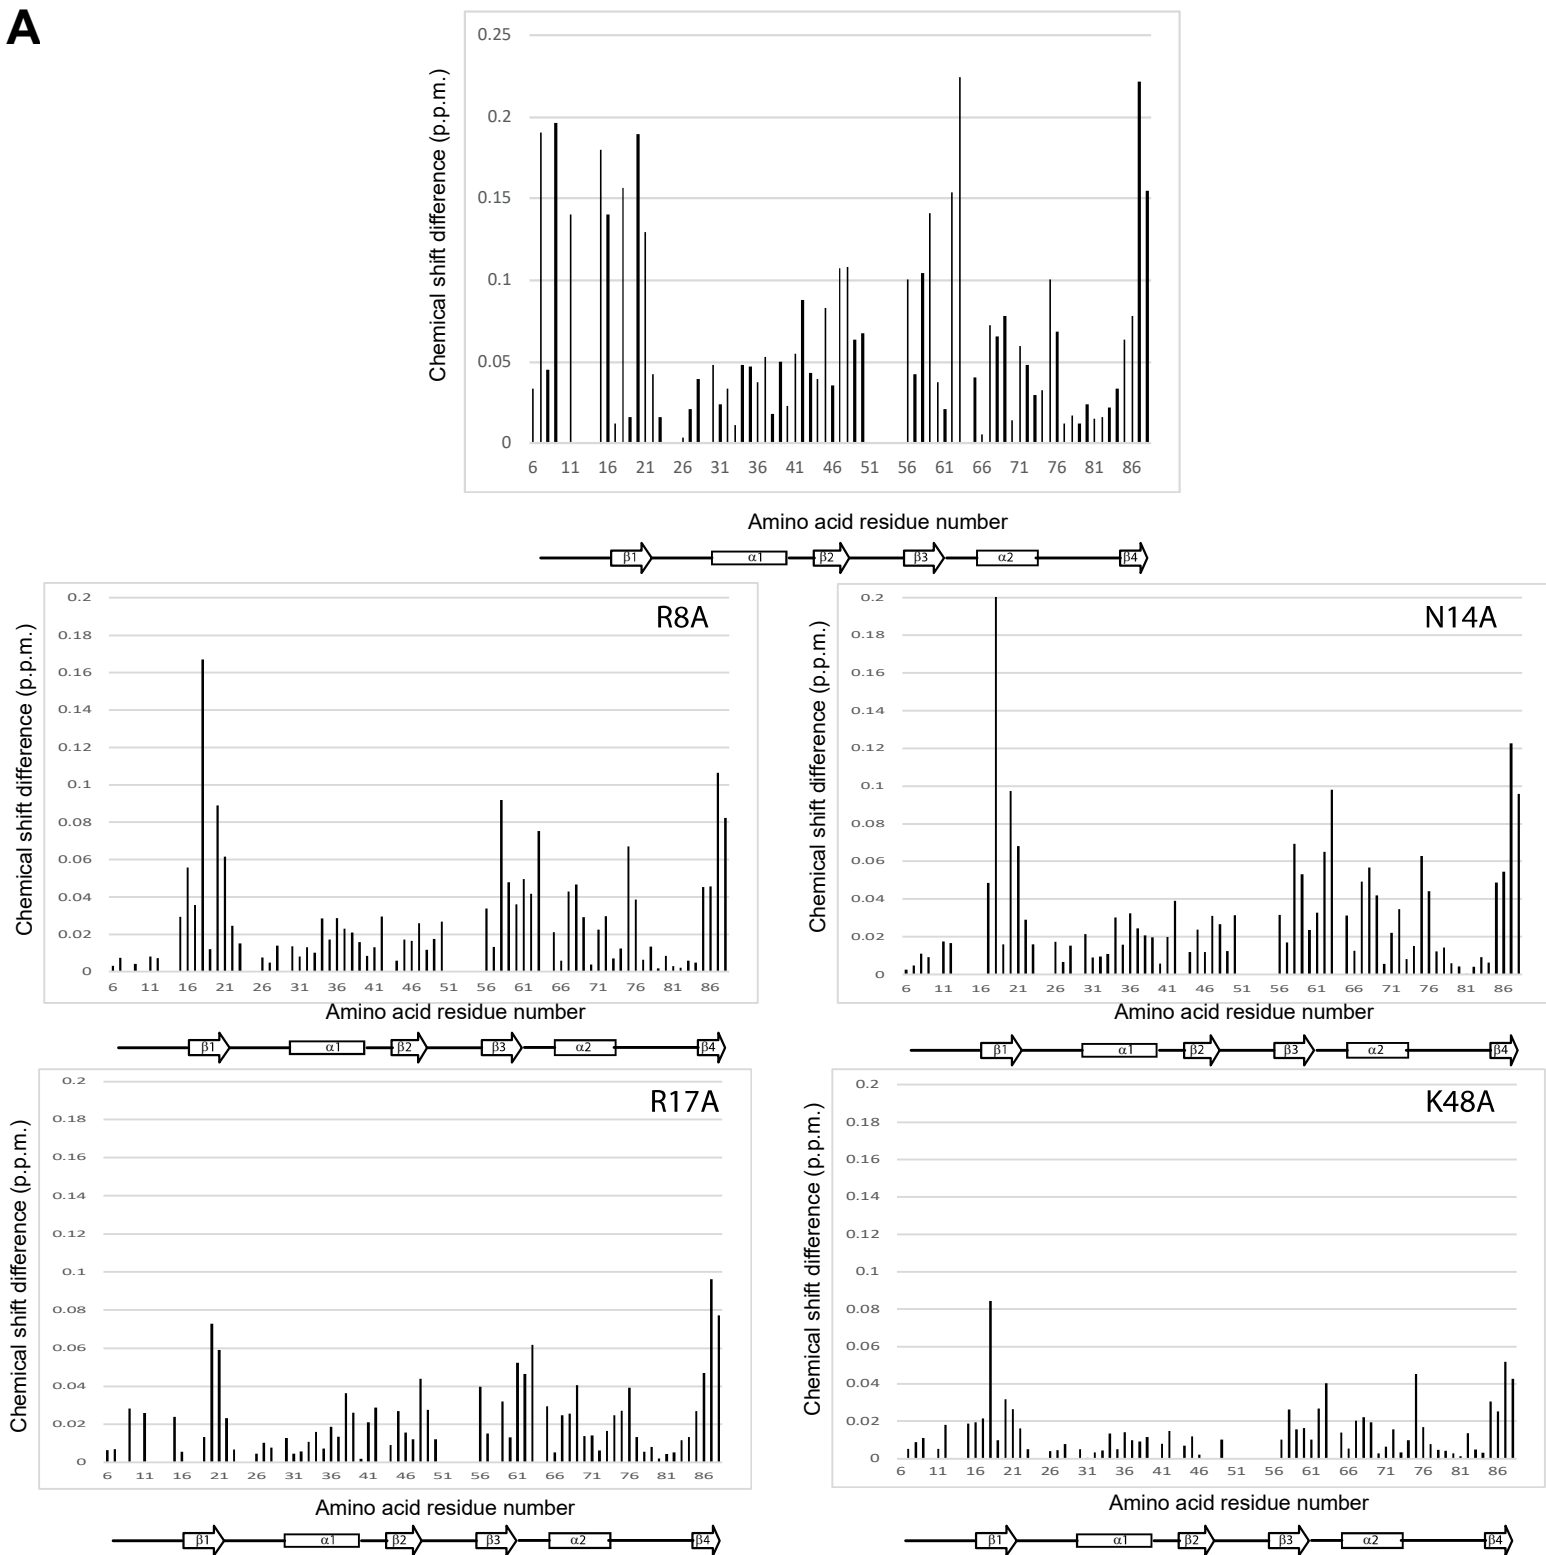**B**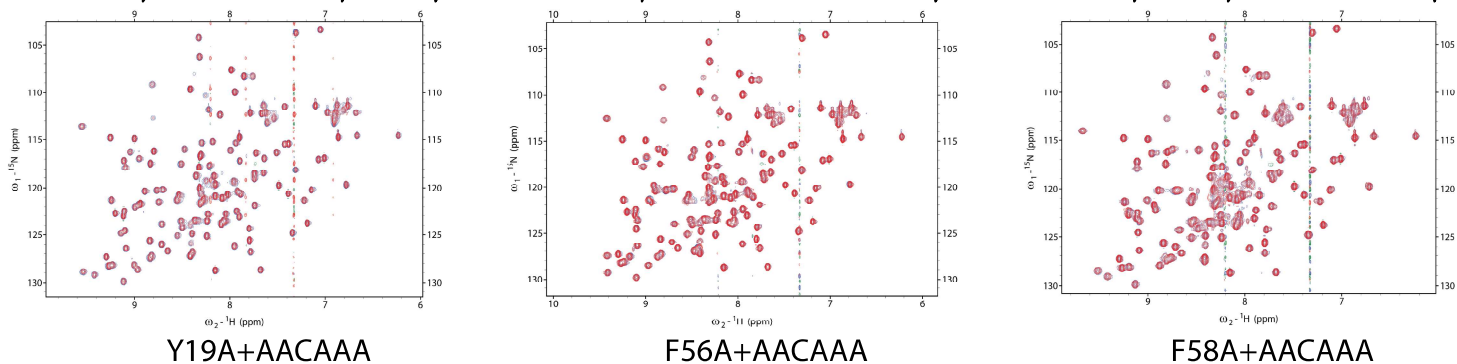

**Figure S6: Effect of R8A, N14A, R17A, Y19A, K48A, F56A and F58A on chemical shift perturbations observed upon binding of these SRSF1 RRM1 variants to AACAAA ssDNA.**

**(A)** Representation of the combined chemical-shift perturbations of R8A, N14A, R17A and K48A SRSF1 variant amides upon binding to 5'-AACAAA-3' ssDNA, as a function of RRM1 amino acid sequence. Secondary-structure elements of the protein domain are displayed at the bottom of the graphs. **(B)** Superimposition of  $^1\text{H}$ - $^{15}\text{N}$  HSQC spectra recorded with  $^{15}\text{N}$ -labeled SRSF1 RRM1 free (in blue) and in the presence of AACAAA ssDNA (in red). No chemical shift perturbation was observed upon addition of ssDNA. All measurements were performed at 40°C (313K), in the NMR buffer.

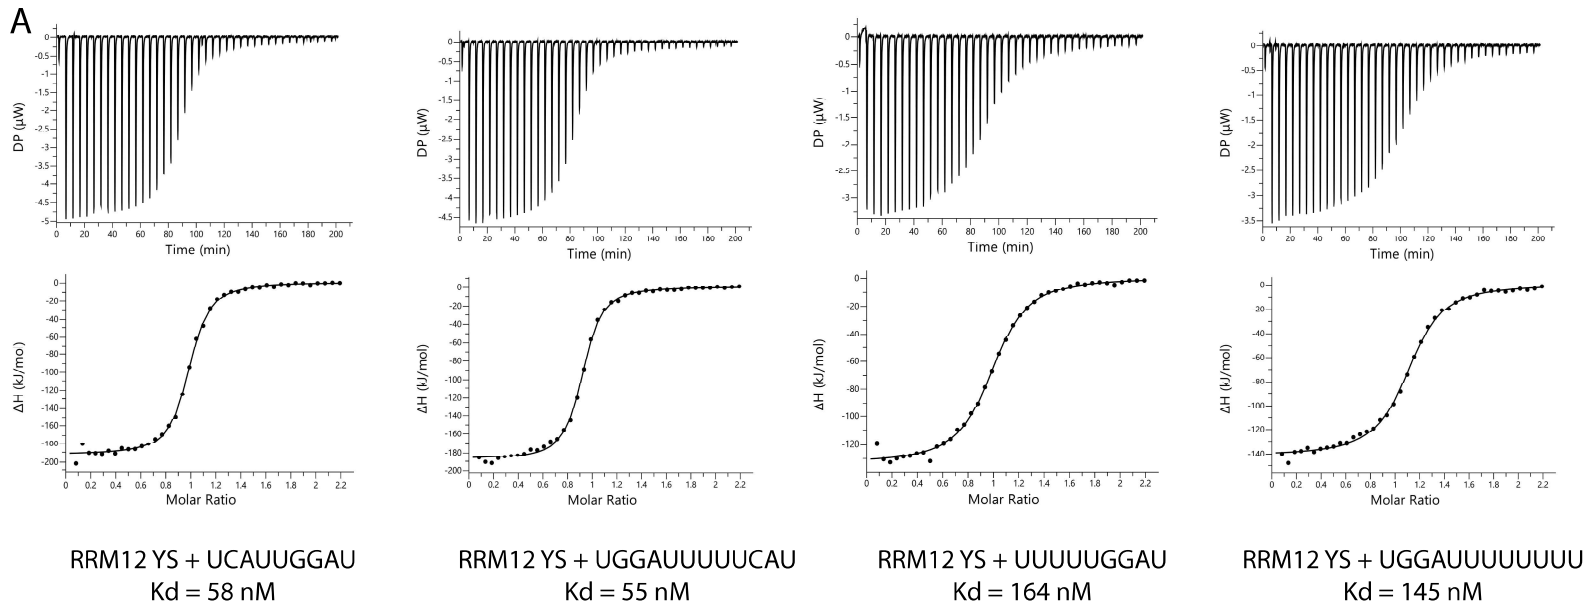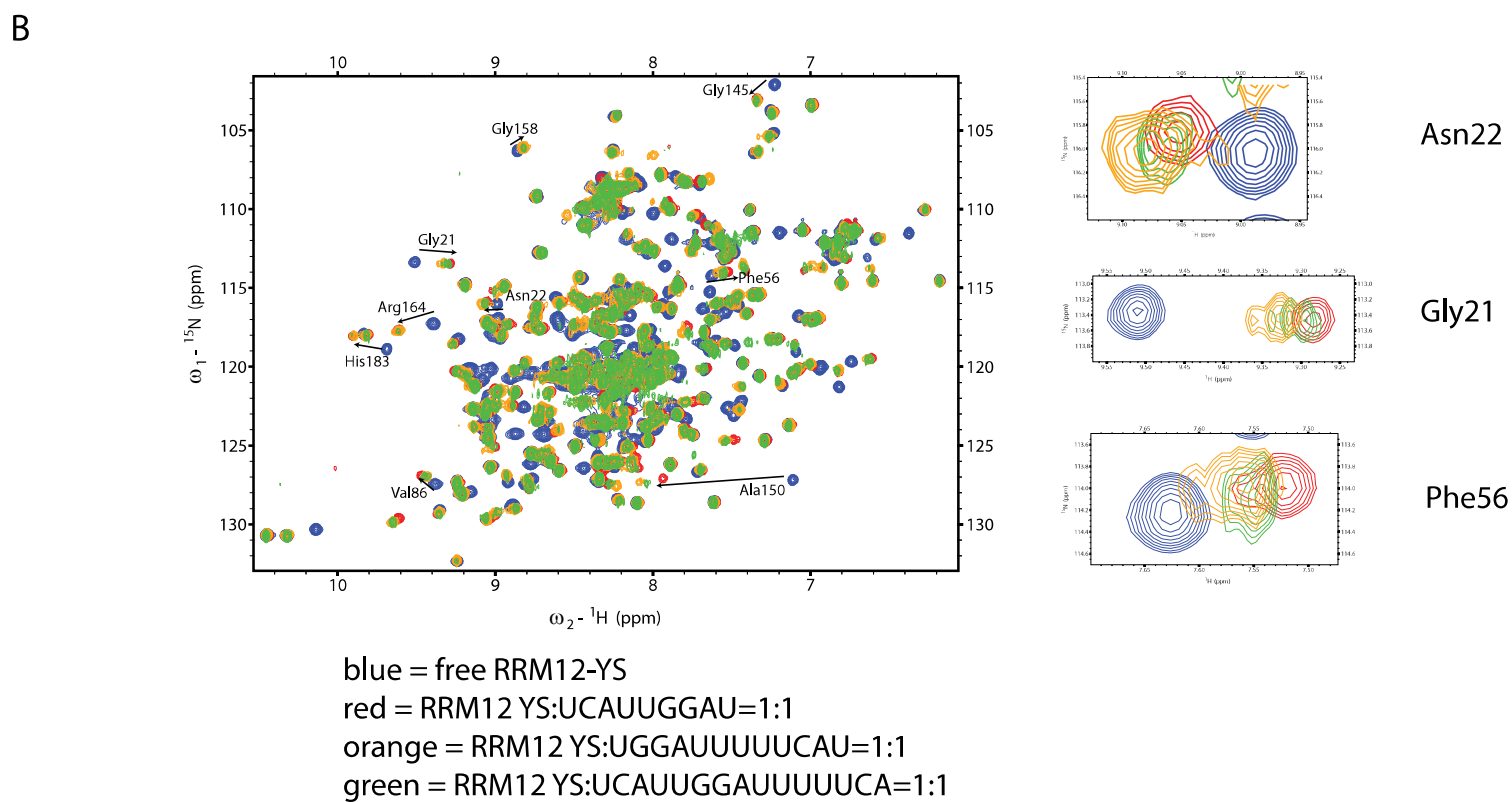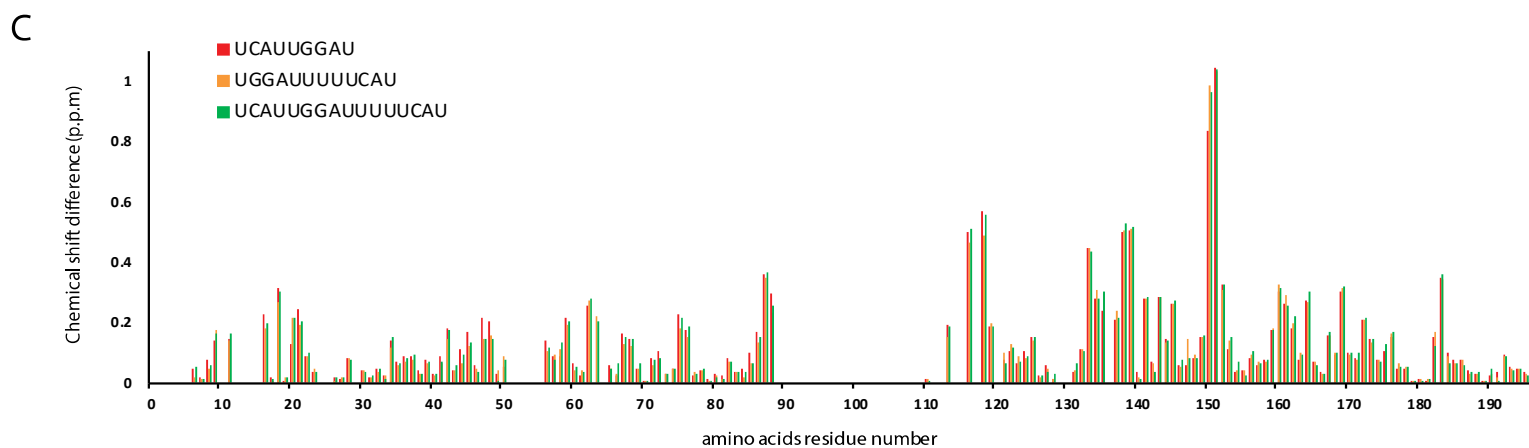

**Figure S7: Investigation of SRSF1 RRM12 Y37S+Y72S binding to RNA**

**(A)** ITC titrations performed at 40°C with SRSF1 RRM12 YS and UCAUUGGAU, UGGAUUUUUCAU, UUUUUGGAU and UGGAUUUUUUUU RNAs. **(B)** Overlay of <sup>1</sup>H-<sup>15</sup>N HSQC spectra measured with SRSF1 RRM12 YS free form (in blue) and bound to UCAUUGGAU, UGGAUUUUUCAU and UCAUUGGAUUUUUCAU RNAs at a 1:1 RNA:protein ratio (in red, orange and green, respectively). **(C)** Representation of the combined chemical-shift perturbations observed in the panel B.

A

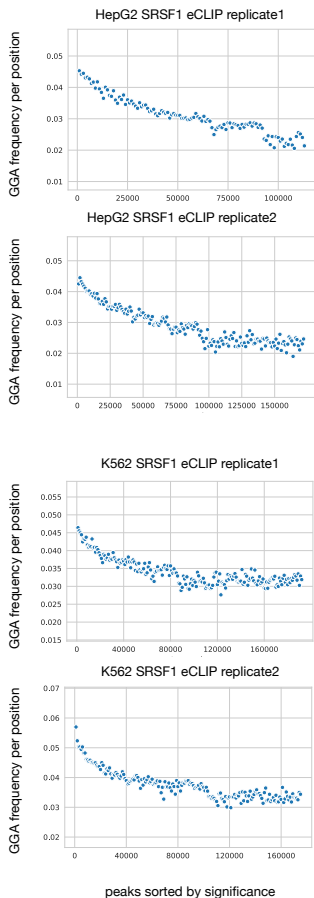

B

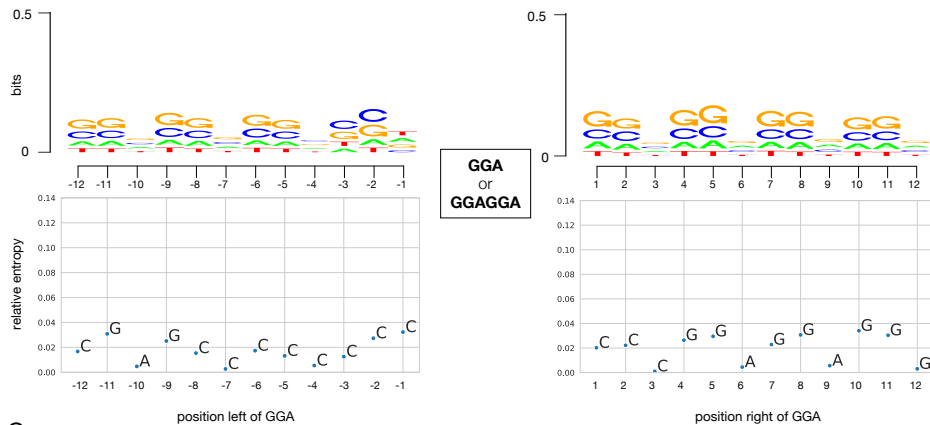

C

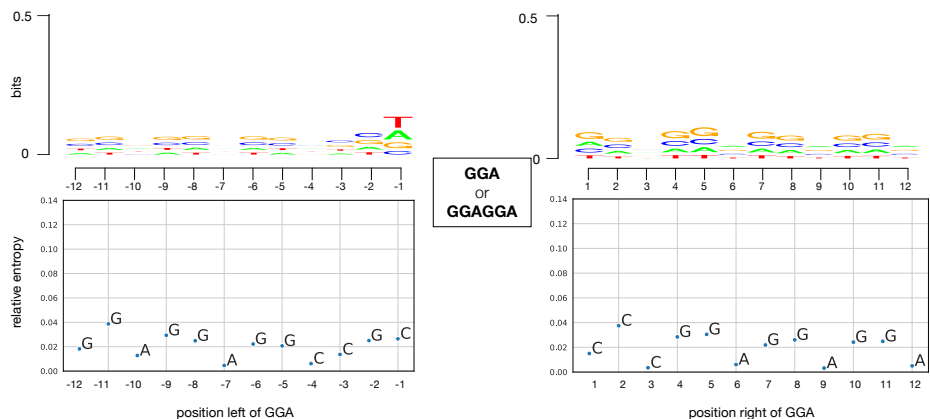

**Figure S8: Re-analysis of eCLIP data of SRSF1 (obtained from ENCODE) in two human cell lines (HepG2 and K562).** (A) Average frequency of GGA motifs per peak position for non-overlapping bins of 1000 peaks obtained from ENCODE and sorted from most to least significant (based on p-value). The frequency of GGAs decreases from the most significant to the least significant peaks, for both cell lines and all replicates. (B) Sequence logo of nucleotide frequencies and position-dependent relative entropy around the GGA motifs in SRSF1 eCLIP-derived peaks from human HepG2 cells. A weak enrichment for C is observed at multiple positions in the vicinity of the GGA motif. (C) The same observations are made for K562 cell line, with a lower signal strength.

**Table S1: Structural statistics of the SRSF1 RRM1 in complex with AACAAA RNA**

|                                                                        | Protein             | RNA             |
|------------------------------------------------------------------------|---------------------|-----------------|
| <b>NMR distance and dihedral constraints</b>                           |                     |                 |
| Distance restraints                                                    |                     |                 |
| Total NOE                                                              | 1537                | 6               |
| Intra-residue                                                          | 333                 | 6               |
| Inter-residue                                                          |                     |                 |
| Sequential ( $ i - j  = 1$ )                                           | 416                 | 0               |
| Nonsequential ( $ i - j  > 1$ )                                        | 788                 | 0               |
| Hydrogen bonds                                                         | 15                  | 0               |
| Protein-RNA intermolecular                                             |                     | 33              |
| Total dihedral angle restraints                                        |                     | 6               |
| Protein                                                                |                     |                 |
| $\phi$                                                                 | 0                   |                 |
| $\psi$                                                                 | 0                   |                 |
| Nucleic acid                                                           |                     |                 |
| Base pair                                                              |                     | 0               |
| Sugar pucker                                                           |                     | 6               |
| Backbone                                                               |                     | 0               |
| Based on A-form geometry                                               |                     | 0               |
| <b>Structure statistics</b>                                            |                     |                 |
| Violations (mean and s.d.)                                             |                     |                 |
| Number of distance constraints ( $>0.3 \text{ \AA}$ ) ( $\text{\AA}$ ) | $1 \pm 0.5$         |                 |
| Dihedral angle constraints ( $^\circ$ )                                | 0                   |                 |
| Max. dihedral angle violation ( $^\circ$ )                             | 0                   |                 |
| Max. distance constraint violation ( $\text{\AA}$ )                    | $0.33 \pm 0.02$     |                 |
| Deviations from idealized geometry                                     |                     |                 |
| Bond lengths ( $\text{\AA}$ )                                          | $0.0042 \pm 0.0001$ |                 |
| Bond angles ( $^\circ$ )                                               | $1.228 \pm 0.016$   |                 |
| Average pairwise r.m.s. deviation** ( $\text{\AA}$ )                   |                     |                 |
| Protein                                                                |                     |                 |
| Heavy                                                                  | $1.75 \pm 0.24$     |                 |
| Backbone                                                               | $1.15 \pm 0.25$     |                 |
| RNA                                                                    |                     |                 |
| All RNA heavy                                                          |                     | $0.54 \pm 0.14$ |
| Complex                                                                |                     |                 |
| Protein and RNA heavy                                                  |                     | $1.71 \pm 0.23$ |

\*\* Protein r.m.s. deviation was calculated using residues 17 to 88 for the ensemble of 20 refined structures.  
RNA r.m.s. deviation was calculated using nucleotides 3 and 4 for the ensemble of 20 refined structures.



| Protein      | Selected in vitro   | Selected in vivo    | Method                                       | Reference                         |
|--------------|---------------------|---------------------|----------------------------------------------|-----------------------------------|
| <b>SRSF1</b> |                     |                     |                                              |                                   |
| RRM12        | AGGA                |                     | RNAcompete                                   | Ray et al. 2009 (25)              |
| FL           |                     | GGAGA               | CLIP-seq in mouse                            | Pandit et al., 2013 (23)          |
| FL           |                     | AGGA                | iCLIP in mouse                               | Müller-McNicoll et al., 2016 (39) |
| RRM12        | RGAAGAAC            |                     | SELEX                                        | Tacke and Manley 1995 (22)        |
| RRM12        | AGGACAGAGC          |                     | SELEX                                        | Tacke and Manley 1995 (22)        |
| RRM1         | ACGCGCA             |                     | SELEX                                        | Tacke and Manley 1995 (22)        |
| FL           |                     | UCAGAGGA            | RNA-seq                                      | Anczuków et al. 2015 (31)         |
| RRM2         | GGA                 |                     | NMR structure                                | Clery et al., 2013 (20)           |
| FL           |                     | GAAGAAG             | CLIP in human                                | Sanford et al., 2009 (28)         |
| FL           | SRSASGA             |                     | functional SELEX, R=A/G, S=C/G, W=A/U, M=A/C | Liu et al., 1998 (24)             |
| FL           | CRSMGW              |                     | functional SELEX, R=A/G, S=C/G, W=A/U, M=A/C | Categni et al., 2002 (7)          |
| FL           | CcccGG/cA           |                     | functional SELEX                             | Smith et al., 2006 (33)           |
| RRM12        | GGAGGA              |                     | RNAcontext                                   | Ray et al. 2013 (26)              |
| FL           |                     | AGAAGAAG            | CLIP in human                                | Wang et al., 2011 (29)            |
|              |                     |                     |                                              |                                   |
| <b>SRSF5</b> |                     |                     |                                              |                                   |
| RRM12        | UGGGAGCRGU YRGCUCGY |                     | SELEX                                        | Tacke et al., 1997 (40)           |
| FL           | ACDGS               |                     | Functional SELEX                             | Liu et al., 1998 (24)             |
| FL           |                     | UCGGA               | CLIP in mouse                                | McNicoll et al., 2016 (39)        |
|              |                     |                     |                                              |                                   |
| <b>SRSF6</b> |                     |                     |                                              |                                   |
| RRM12        | GAUCAACCU GGCGAC    |                     | SELEX                                        | Shi et al., 1997 (27)             |
| FL           | USCGKM              |                     | Functional SELEX                             | Liu et al., 1998 (24)             |
| FL           |                     | GAU <sub>A</sub> GA | CLIP in mouse                                | McNicoll et al., 2016 (39)        |

**Table S2:** Summary of the consensus sequences found *in vitro* and *in vivo* with SRSF1. Our structural studies allow the identification of the motifs recognized by SRSF1 RRM1 and RRM2, which are colored in green and red, respectively. R=A/G, Y=C/U, S=C/G, K=G/U, W=A/U, M=A/C, D=A/G/U.
